# Supplementary material for: A supramolecular-confinement pyrolysis route to ultrasmall rhodium phosphide nanoparticles as a robust electrocatalyst for hydrogen evolution in the entire pH range and seawater electrolysis
Source: Royal Society of Chemistry journal article supplement (doi:10.1039/d0ta09644j), 2020-01-01
Supplement: d0ta09644j1.pdf [file d0ta09644j1.pdf]

**Supporting Information for**  
**Supramolecular-Confinement Pyrolysis Route to Ultrasmall Rhodium**  
**Phosphide Nanoparticles as Robust Electrocatalyst for Hydrogen**  
**Evolution at All pH Range and Seawater Electrolysis**

Shoujie Liu<sup>b,c,#</sup>, Yinjuan Chen<sup>a,#</sup>, Li Yu<sup>d,#</sup>, Yan Lin<sup>a</sup>, Zhi Liu<sup>a</sup>, Minmin Wang<sup>a</sup>, Yanju Chen<sup>a</sup>,  
Chao Zhang<sup>e</sup>, Yuan Pan<sup>a,\*</sup>, Yunqi Liu<sup>a</sup>, Chenguang Liu<sup>a</sup>

<sup>a</sup>State Key Laboratory of Heavy Oil Processing, China University of Petroleum (East China),  
Qingdao, 266580, China

<sup>b</sup>Chemistry and Chemical Engineering of Guangdong Laboratory, Shantou 515063, China

<sup>c</sup>College of Chemistry and Materials Science, Anhui Normal University, Wuhu, Anhui 241000,  
China

<sup>d</sup>College of Health Science and Environmental Engineering, Shenzhen Technology University,  
Shenzhen, 518118, China

<sup>e</sup>School of Material Science & Engineering, Tianjin University of Technology, Tianjin 300384,  
China

<sup>#</sup>These authors contributed equally.

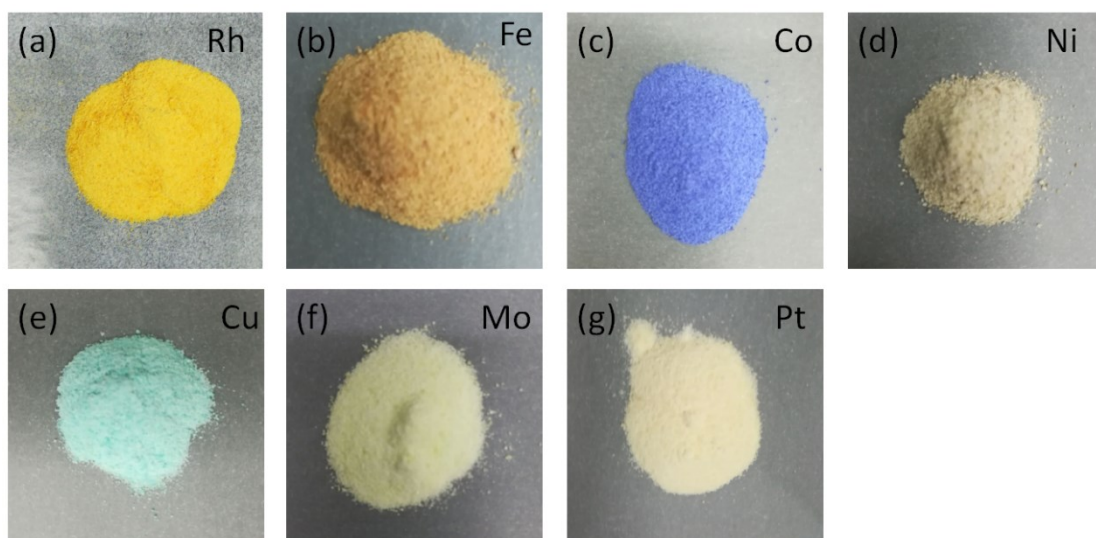

**Figure S1.** Optical photo images of starch@M-PA precursors.

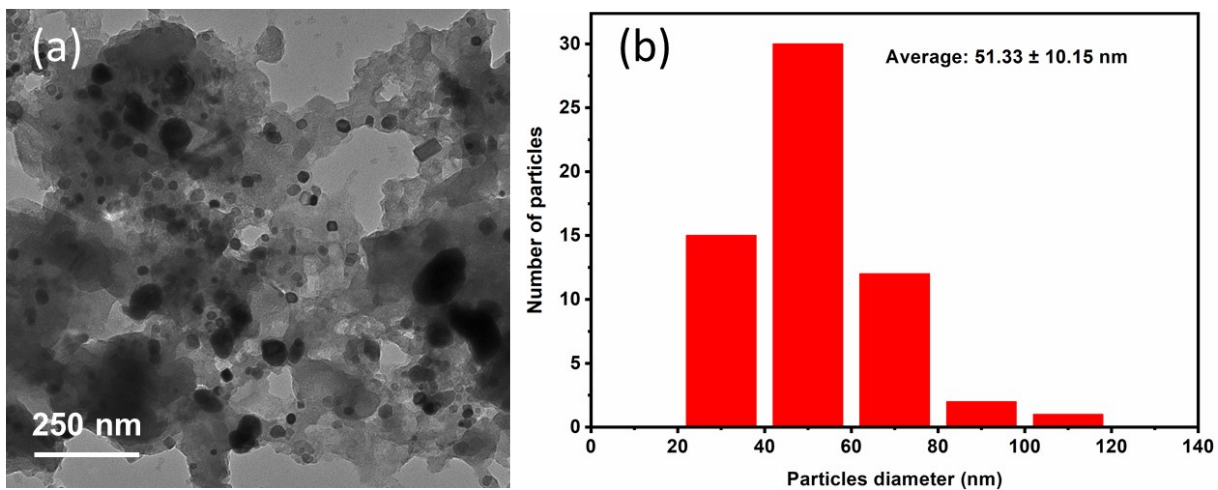

**Figure S2.** TEM image and size distribution of Rh<sub>2</sub>P NPs without the assist of starch.

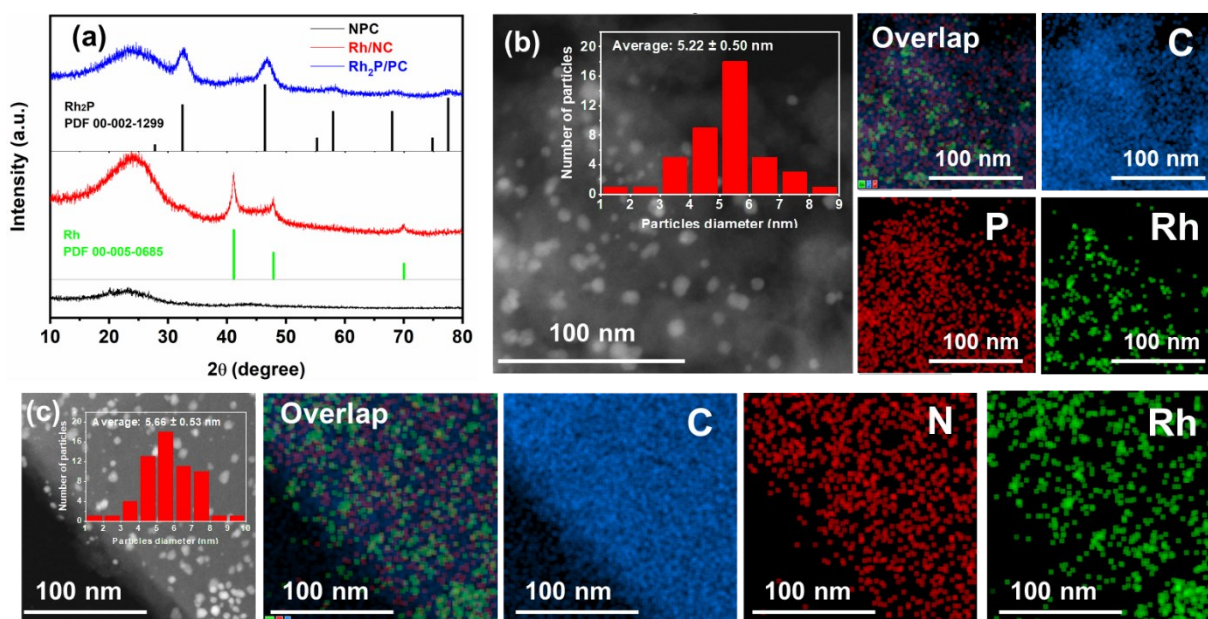

**Figure S3.** (a) XRD patterns of the Rh<sub>2</sub>P/PC, Rh/NC and NPC. HAADF-STEM-EDS mapping images of (b) Rh<sub>2</sub>P/PC and (c) Rh/NC. Inset in (b) and (c) show the corresponding size distribution of Rh<sub>2</sub>P NPs and Rh NPs.

XRD patterns (Figure S3a) confirmed the cubic Rh<sub>2</sub>P phase (PDF No. 00-002-1299, crystal system: cubic, space group: Fm-3m (225),  $a = 5.516$ ,  $b = 5.516$ ,  $c = 5.516$ ) of Rh<sub>2</sub>P/PC and the cubic Rh phase (PDF No. 00-005-0685, space group: Fm-3m,  $a = 3.8031$ ,  $b = 3.8031$ ,  $c = 3.8031$ ) of Rh/NC. For the Rh<sub>2</sub>P/PC sample, the peaks at 32.5°, 46.7°, 57.9°, 68.1°, and 77.6° can be assigned to the (200), (220), (222), (400) and (420) lattice planes of Rh<sub>2</sub>P. For the Rh/NC sample, the peaks at 41.1°, 47.9° and 69.9° can be assigned to the (111), (200) and (220) lattice planes of Rh. All the samples display a broad peak at about 23°, corresponding to the (002) plane of carbon. The average diameter of Rh<sub>2</sub>P and Rh NPs is  $5.22 \pm 0.50$  nm (inset of Figure S3b) and  $5.66 \pm 0.53$  nm (inset of Figure S3c). HAADF-STEM-EDS mapping images (Figure S3b) show that C, P, and Rh elements are homogeneously distributed over the entire PC. HAADF-STEM-EDS mapping images (Figure S3c) also show that C, N and Rh elements are homogeneously distributed over the entire NC.

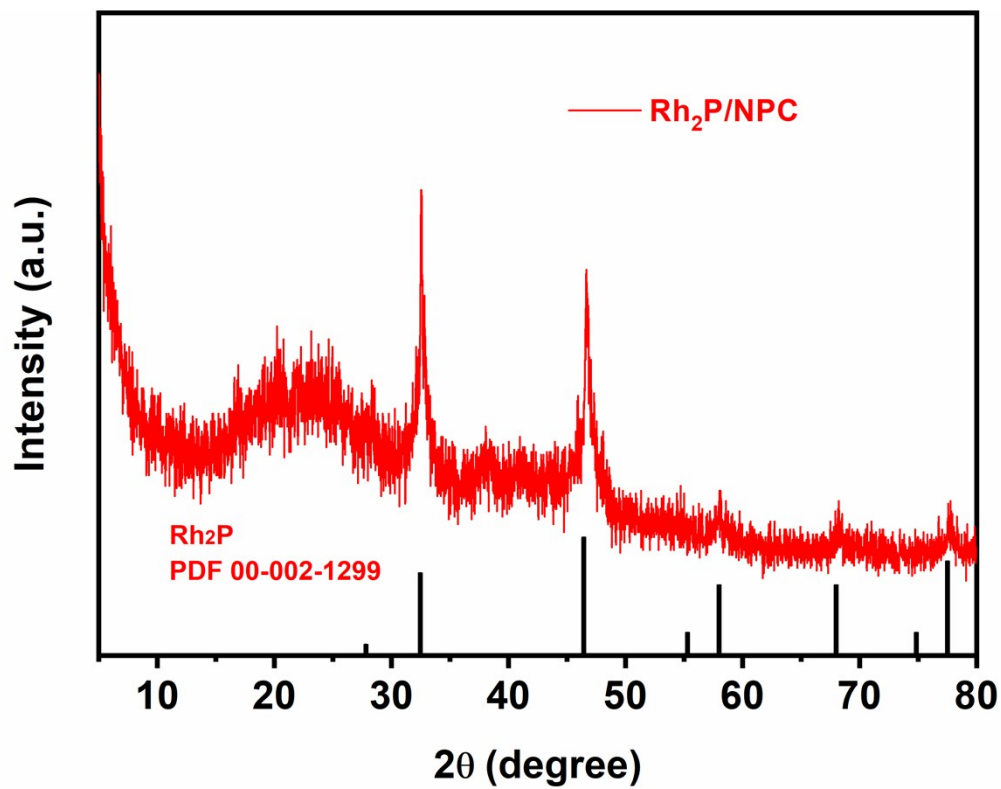

Figure S4. XRD pattern of the Rh<sub>2</sub>P/NPC catalyst.

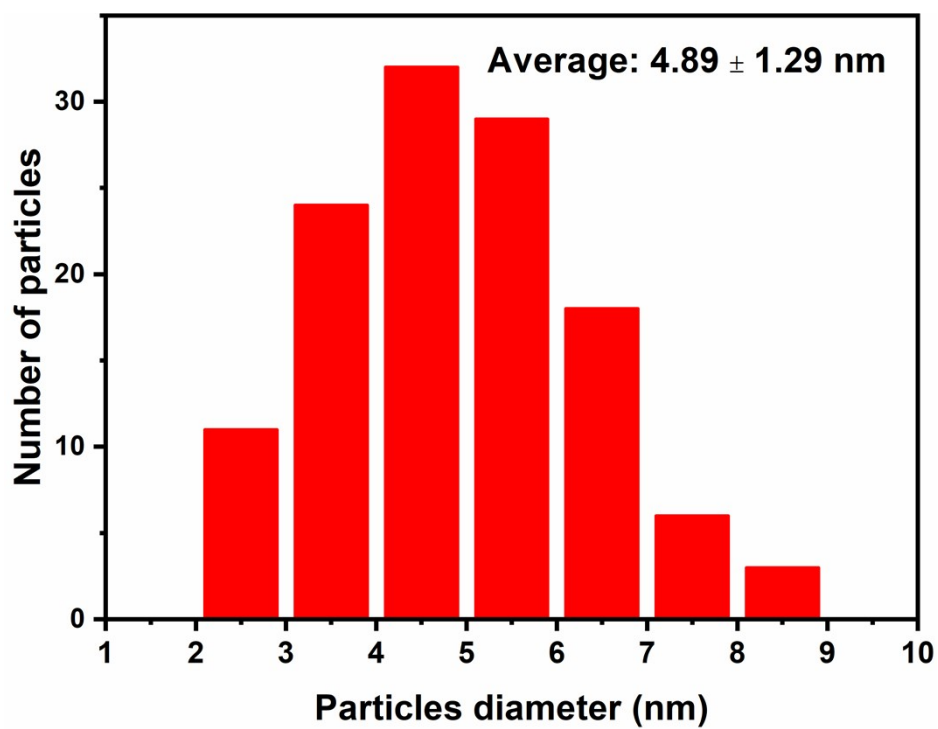

**Figure S5.** Size distribution of the as-synthesized Rh<sub>2</sub>P/NPC catalyst.

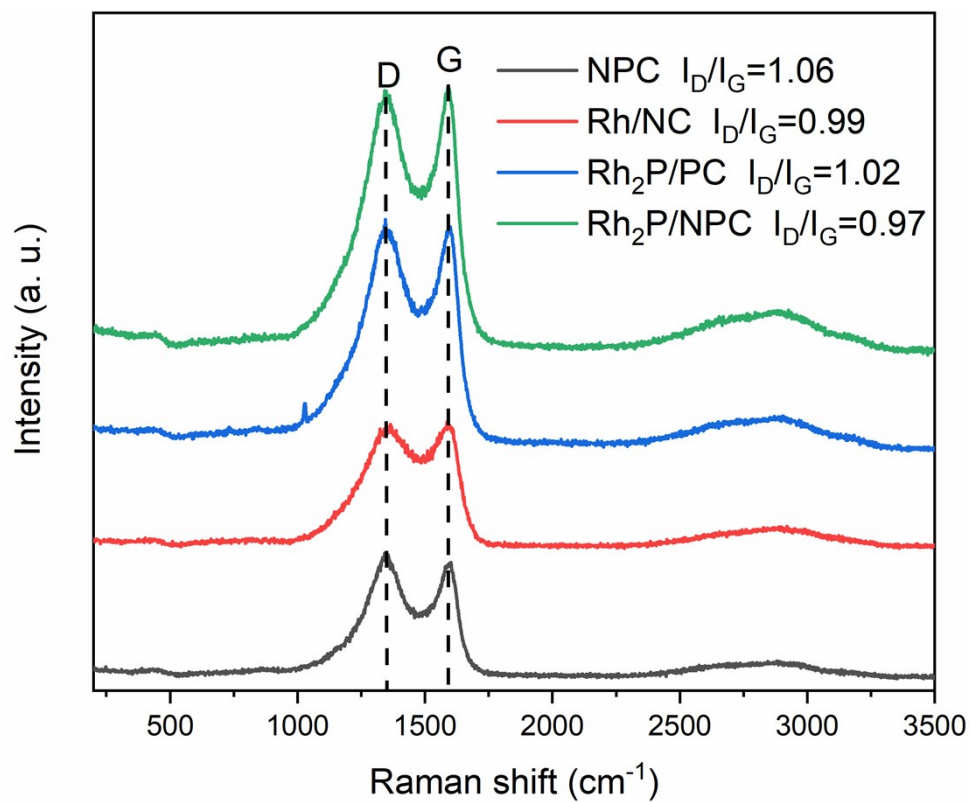

**Figure S6.** Raman spectra of the as-synthesized  $\text{Rh}_2\text{P}/\text{NPC}$ ,  $\text{Rh}_2\text{P}/\text{PC}$ ,  $\text{Rh}/\text{NC}$  and NPC.

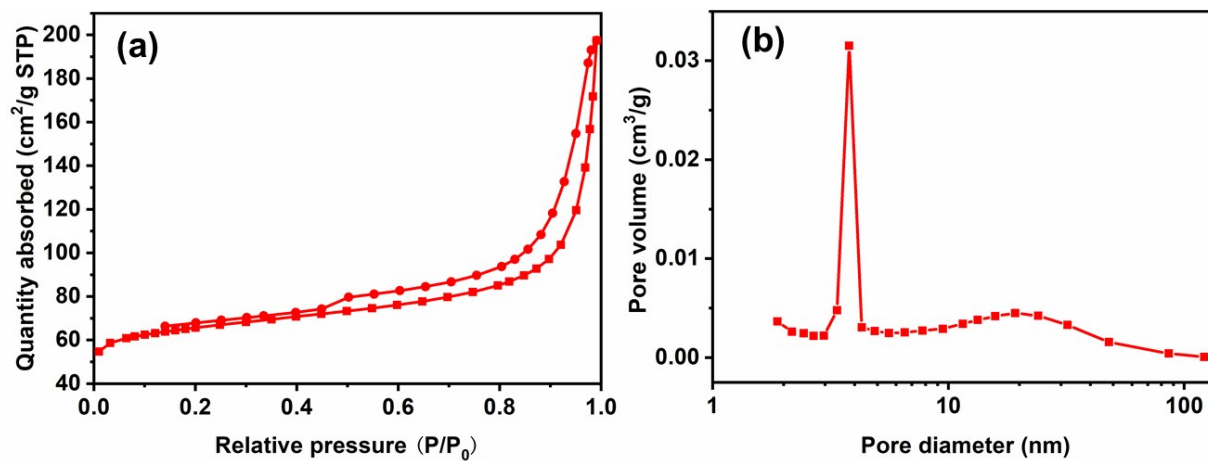

**Figure S7.** (a)  $N_2$  adsorption-desorption isotherms. (b) porous size distribution curves of  $Rh_2P/NPC$ .



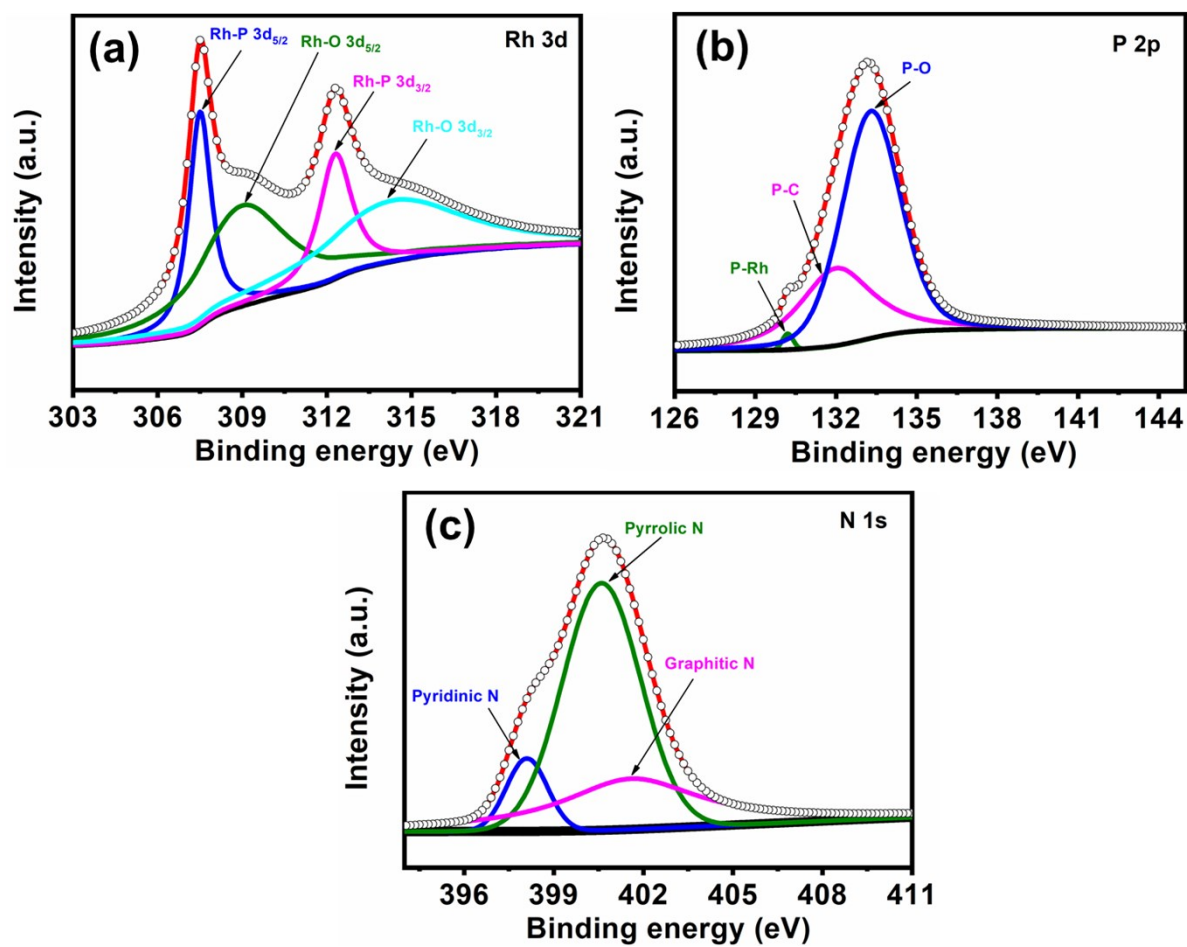

**Figure S8.** (a) Rh 3d, (b) P 2p, (c) N 1s spectra of the as-synthesized  $\text{Rh}_2\text{P}/\text{NPC}$  catalyst.

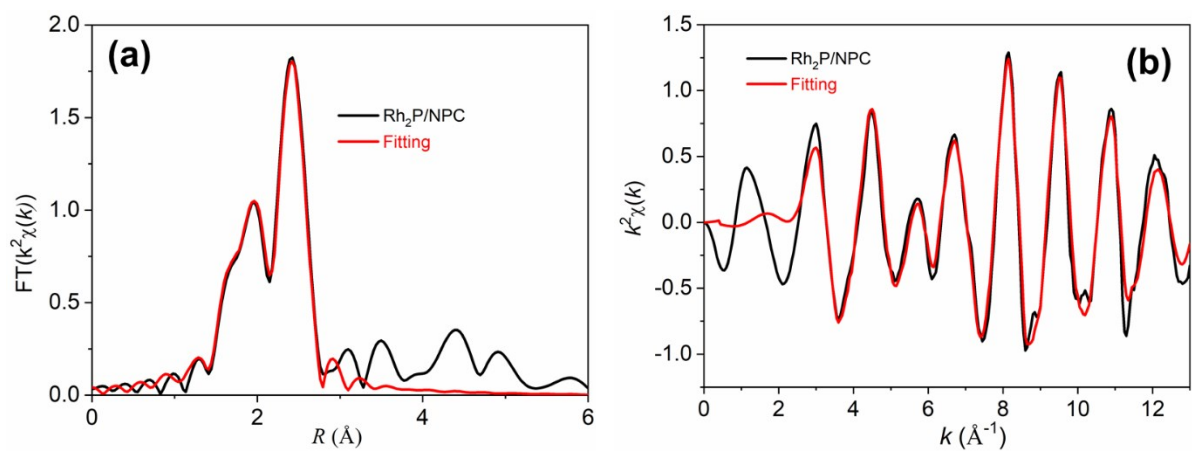

**Figure S9.** The EXAFS fitting of Rh<sub>2</sub>P/NPC at (a) R space and (b) k space.

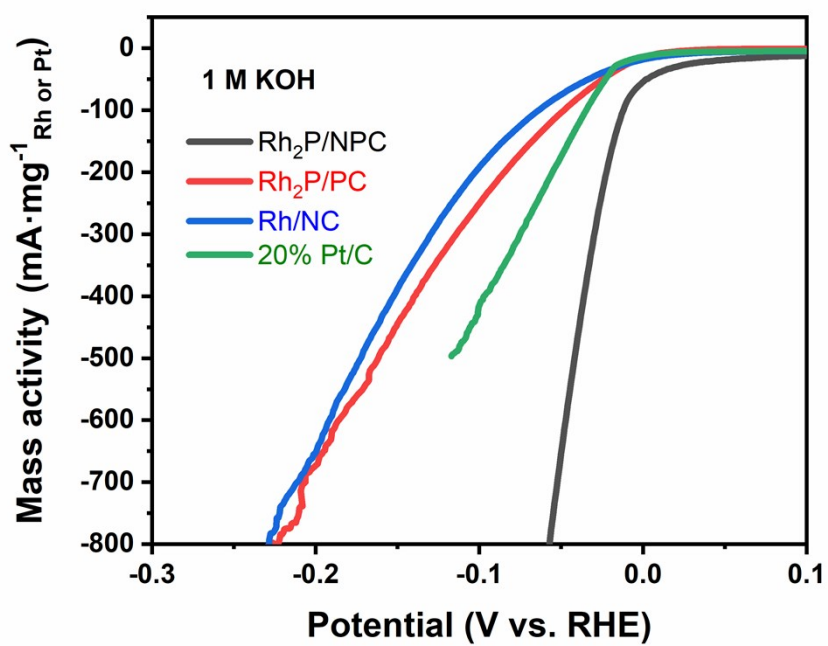

**Figure S10.** The mass activities of Rh<sub>2</sub>P/NPC, Rh<sub>2</sub>P/PC, Rh/NC and 20% Pt/C catalysts in 1M KOH.

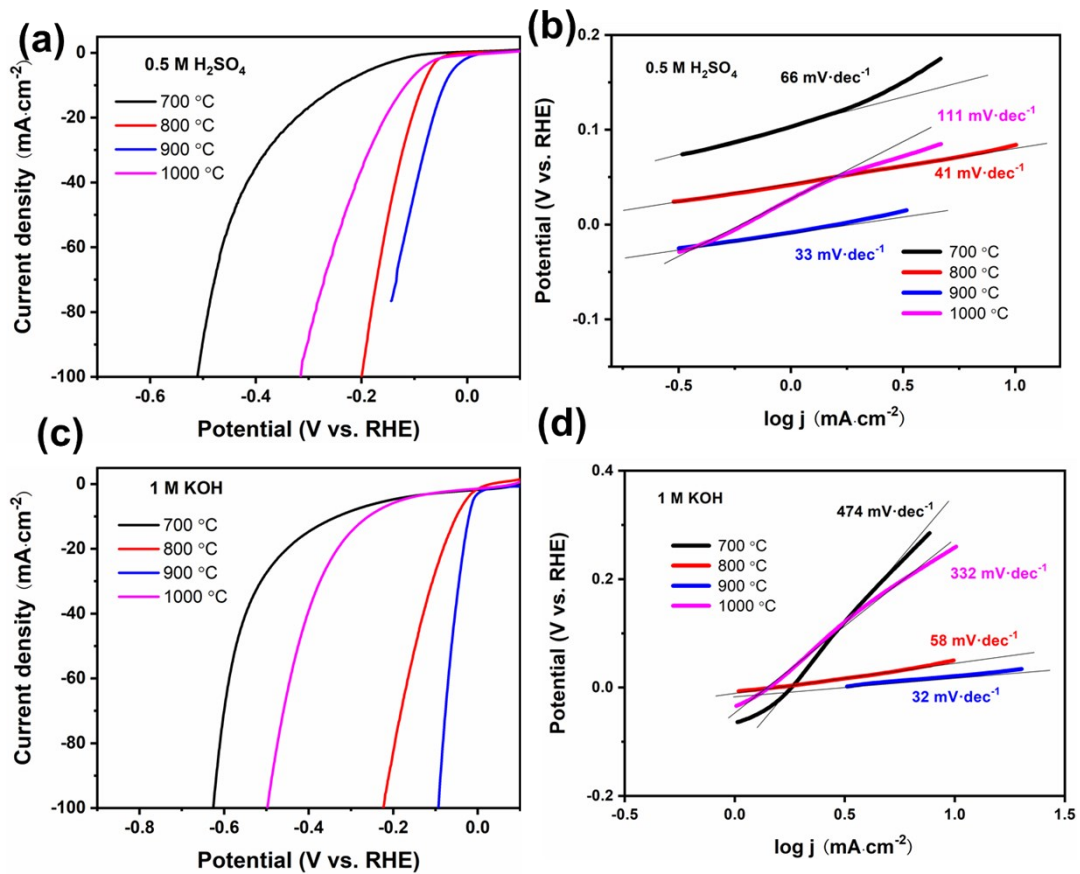

**Figure S11.** (a, c) LSV curves and (b, d) Tafel plots at different pyrolysis temperature of Rh<sub>2</sub>P/NPC catalyst in 0.5 M H<sub>2</sub>SO<sub>4</sub> and 1 M KOH, respectively.

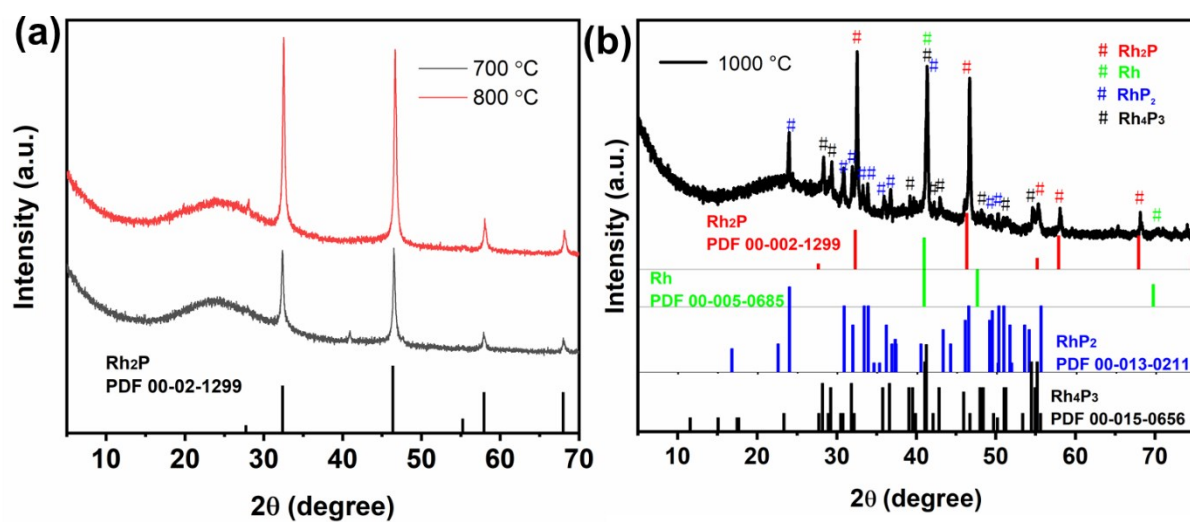

**Figure S12.** XRD patterns of the products at different pyrolysis temperature of (a) 700 °C, 800 °C and (b) 1000 °C.

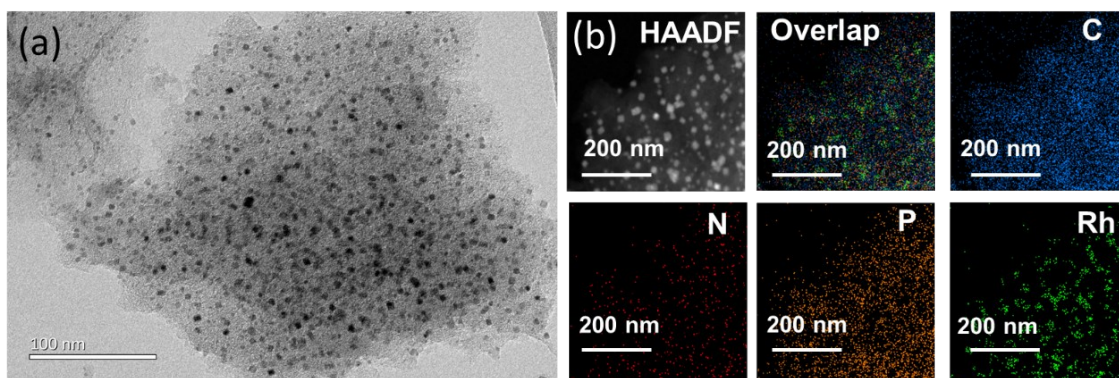

**Figure S13.** (a) TEM and (b) HAADF-STEM-EDS mapping images of Rh<sub>2</sub>P/NPC catalyst after long-term electrolysis in 0.5 M H<sub>2</sub>SO<sub>4</sub>.

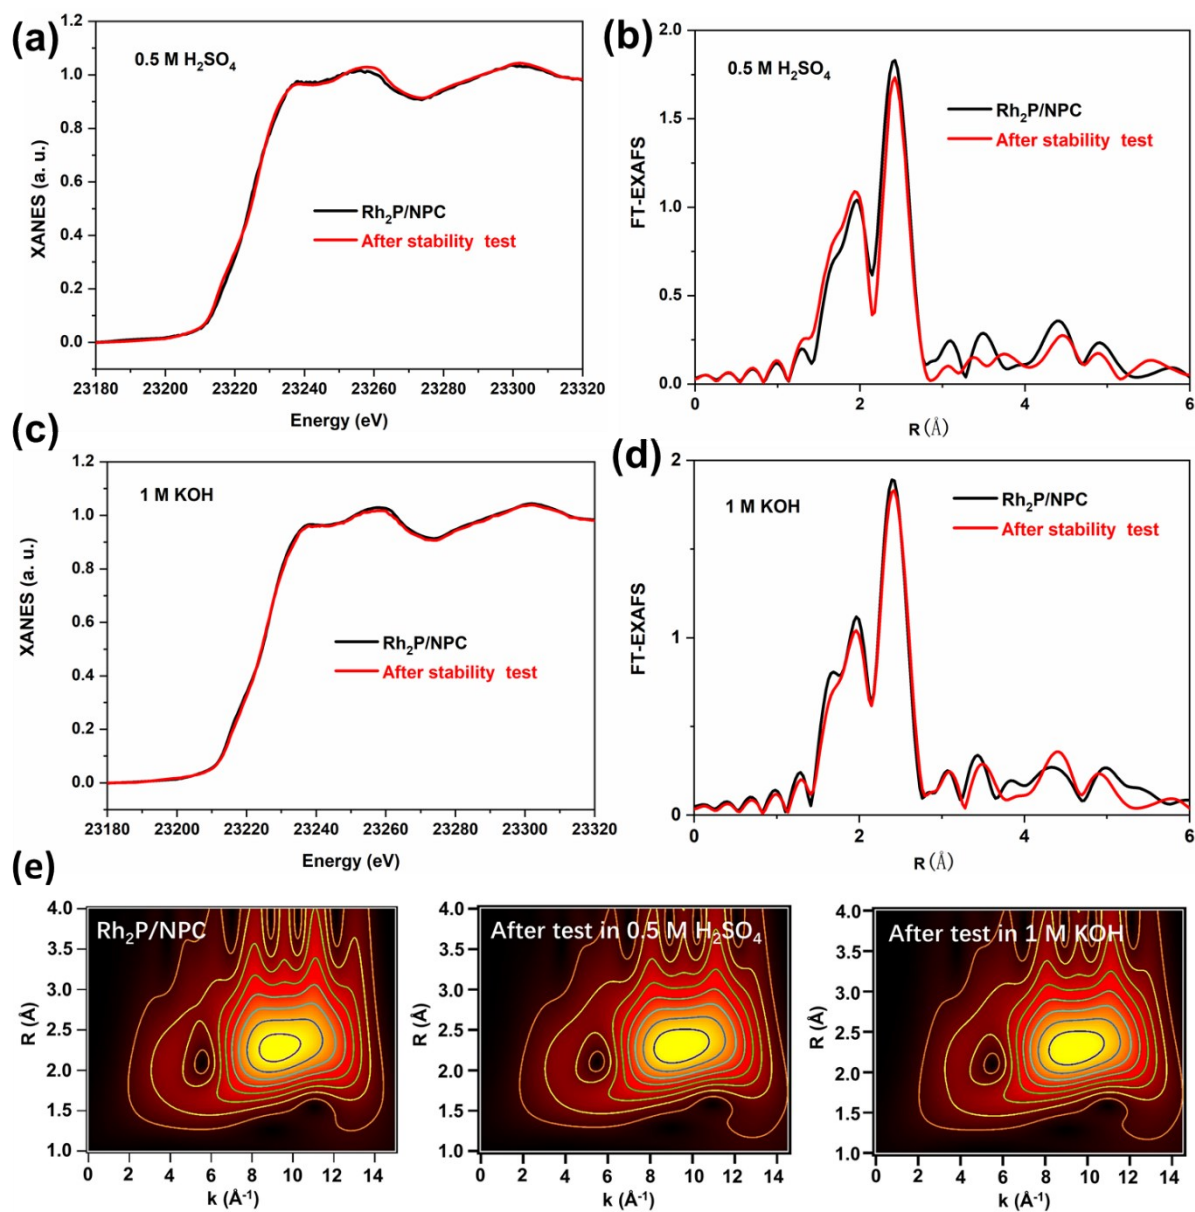

**Figure S14.** (a, c) XANES and (b, d) FT-EXAFS of Rh<sub>2</sub>P/NPC catalyst after long-term electrolysis in 0.5 M H<sub>2</sub>SO<sub>4</sub> and 1 M KOH, respectively. (e) WT plots of the Rh<sub>2</sub>P/NPC catalyst before and after test in 0.5 M H<sub>2</sub>SO<sub>4</sub> and 1 M KOH, respectively.

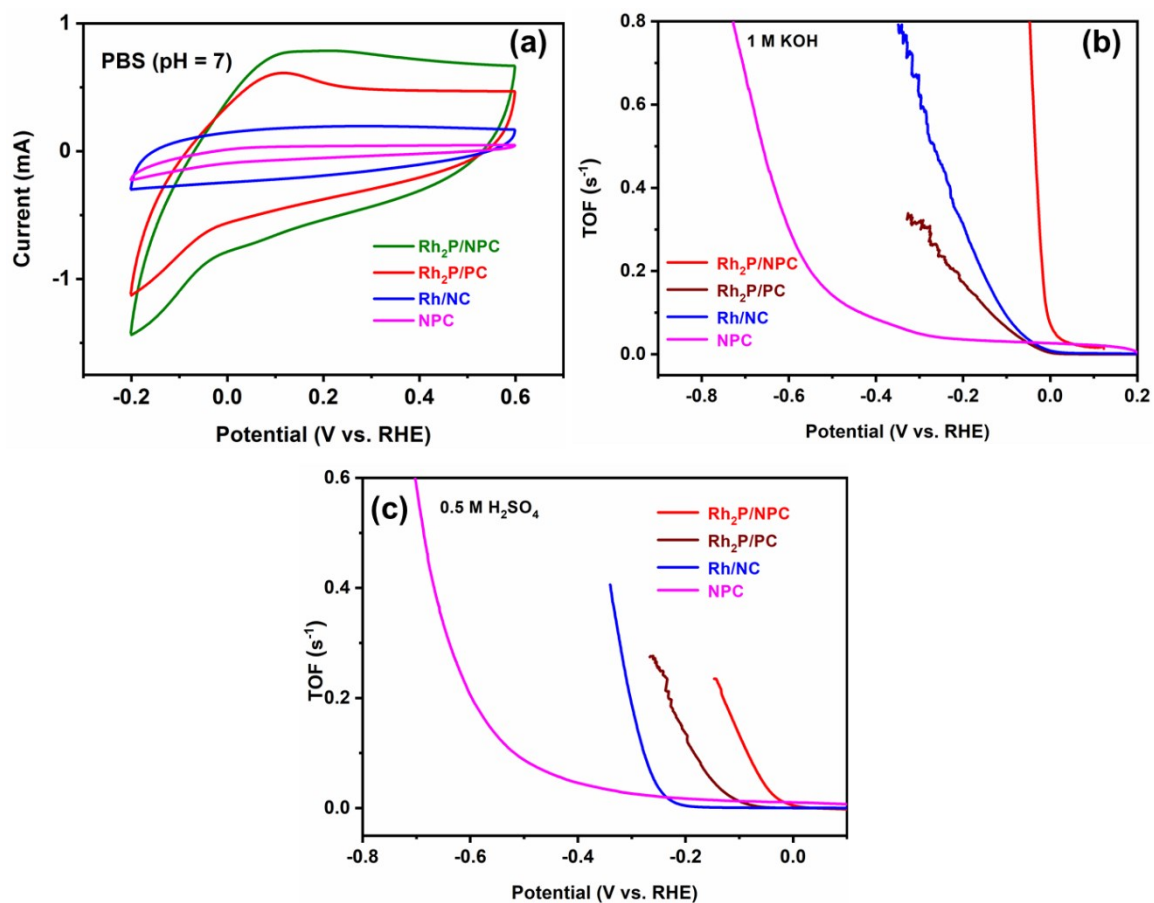

**Figure S15.** (a) CVs the as-synthesized Rh<sub>2</sub>P/NPC, Rh<sub>2</sub>P/PC, Rh/NC, and NPC catalysts at pH = 7 with a scan rate of 20 mV·s<sup>-1</sup>. TOF curves in (b) 1 M KOH and (c) 0.5 M H<sub>2</sub>SO<sub>4</sub>, respectively.



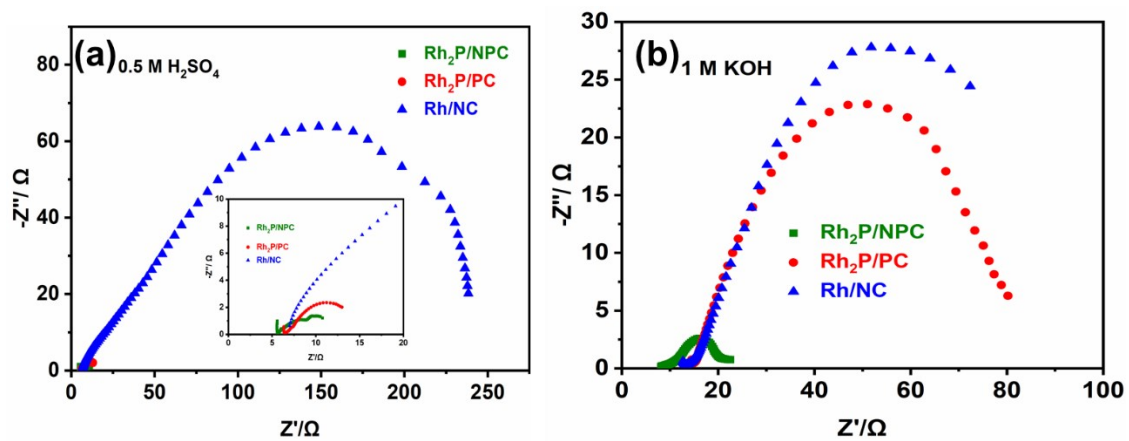

**Figure S16.** Nyquist plots of the as-synthesized Rh<sub>2</sub>P/NPC, Rh<sub>2</sub>P/PC, Rh/NC, and NPC catalysts with an overpotential of 180 mV and 80 mV vs. RHE in (a) 0.5 M H<sub>2</sub>SO<sub>4</sub> and (b) 1 M KOH, respectively.

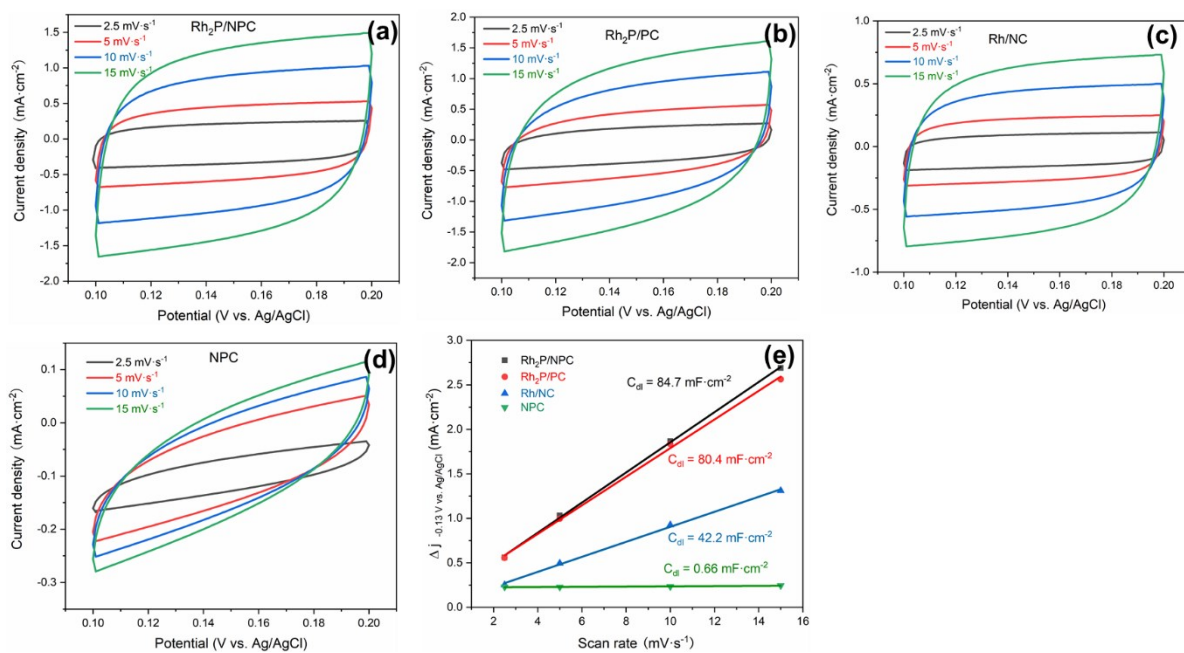

**Figure S17.** CV curves of the as-synthesized (a) Rh<sub>2</sub>P/NPC catalysts, (b) Rh<sub>2</sub>P/PC, (c) Rh/NC, and (d) NPC catalysts in 0.5 M H<sub>2</sub>SO<sub>4</sub> solution in the region of 0.1~0.2 V vs. Ag/AgCl with different scan rates from 2.5 mV·s<sup>-1</sup> to 15 mV·s<sup>-1</sup> for HER.

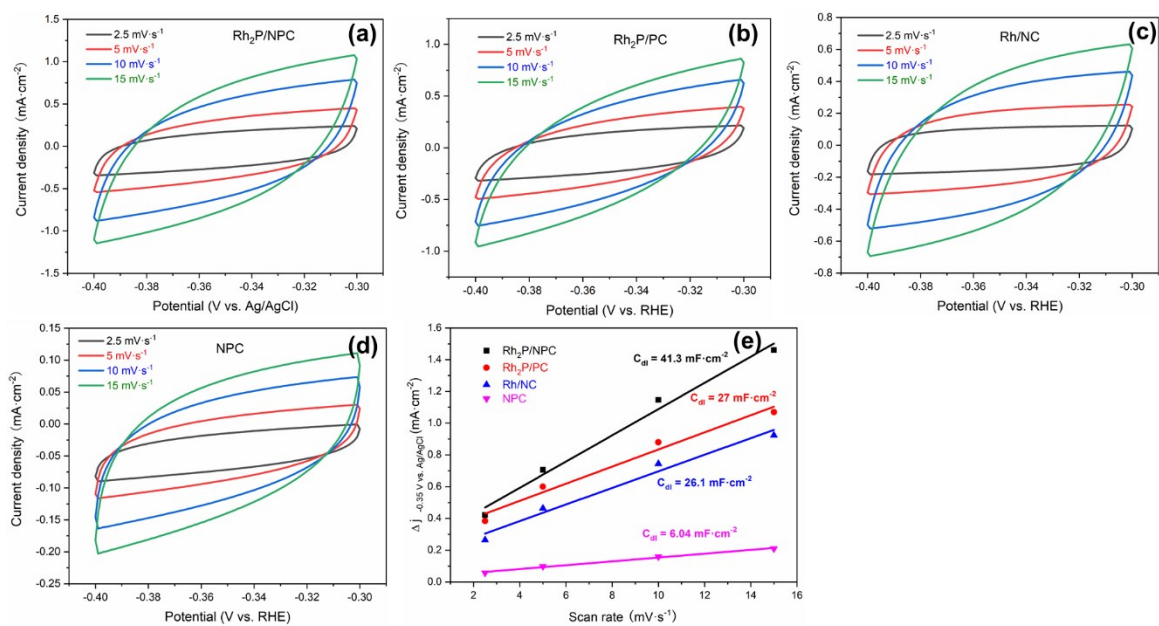

**Figure S18.** CV curves of the as-synthesized (a) Rh<sub>2</sub>P/NPC catalysts, (b) Rh<sub>2</sub>P/PC, (c) Rh/NC, and (d) NPC catalysts in 1 M KOH solution in the region of -0.4~-0.3 V vs. Ag/AgCl with different scan rates from 2.5 mV·s<sup>-1</sup> to 15 mV·s<sup>-1</sup> for HER.

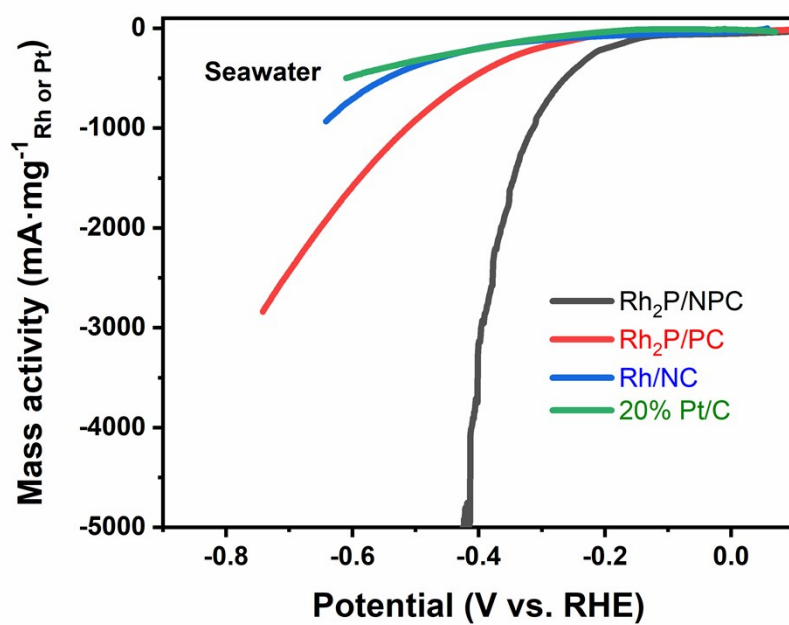

**Figure S19.** The mass activities of Rh<sub>2</sub>P/NPC, Rh<sub>2</sub>P/PC, Rh/NC and 20% Pt/C catalysts in natural seawater.

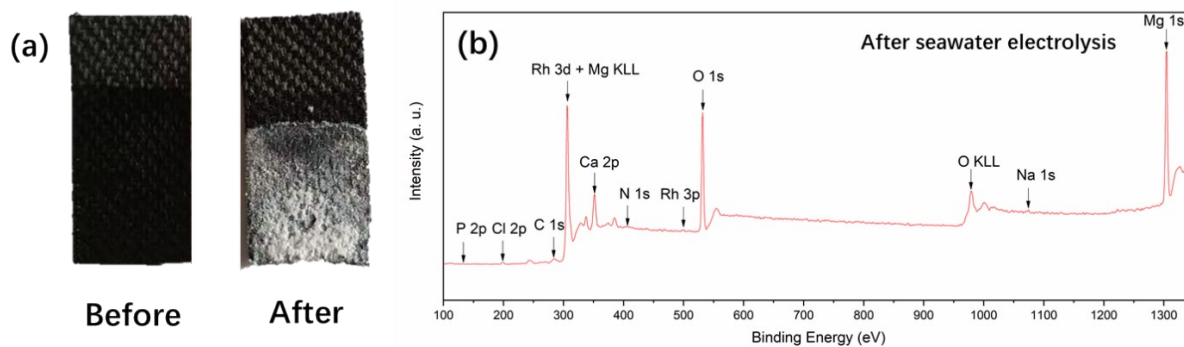

**Figure S20.** (a) Optical images of the Rh<sub>2</sub>P/NPC catalyst before and after seawater electrolysis. (b) XPS survey spectrum of the Rh<sub>2</sub>P/NPC catalyst after seawater electrolysis.

In Figure S20(a), the optical images of the Rh<sub>2</sub>P/NPC catalyst sample clearly show that there are some white insoluble precipitates covering the catalyst surface after seawater electrolysis. In Figure S20(b), the XPS analysis further confirmed the precipitates are mainly comprised of Na, Ca and Mg salts, which are the typical components of natural seawater.

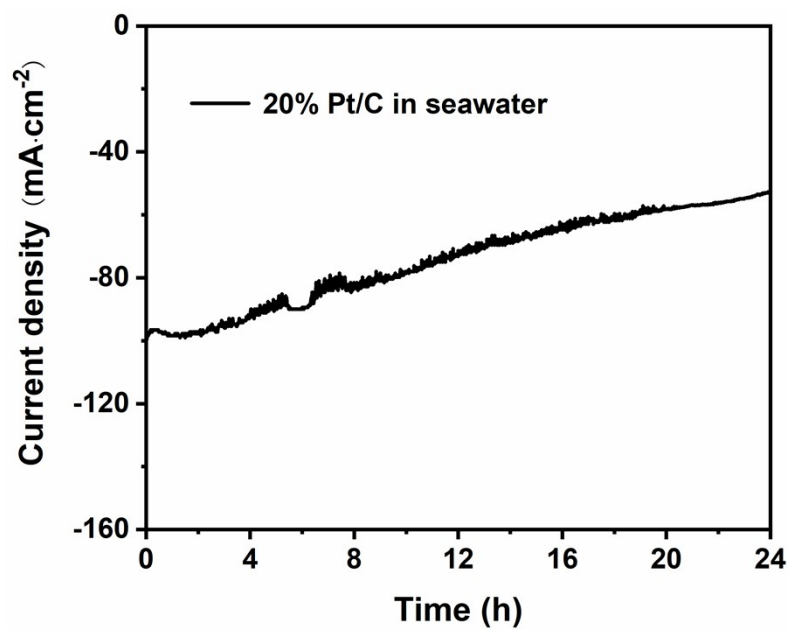

**Figure S21.** Time-dependent current density curves of the 20% Pt/C catalyst at -0.6 V vs. RHE in natural seawater.

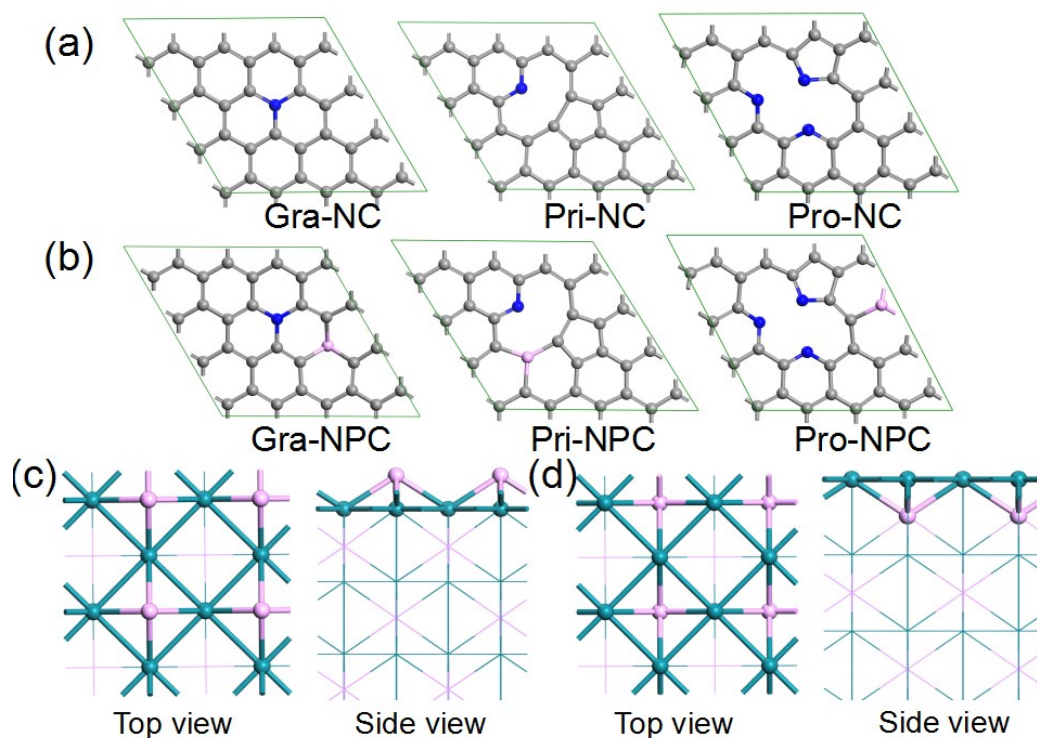

**Figure S22.** Optimized geometry configurations. (a) Modelized N-doped porous carbon (NC) and N, P co-doped porous carbon (NPC), here Gra-, Pri- and Pro- denote graphitic, pyridinic and pyrrolic materials, respectively). Optimized structures of (c) P terminated and (d) Rh terminated Rh<sub>2</sub>P (200) surface.

According to the aforementioned heteroatom's chemical environments obtained from the XPS spectra, graphitic, pyrrolic, and pyridinic N doped graphene sheets were built to simulate the NC. On the base of N, C moieties, the NPC was modeled with one C atom replaced by P atom at the position along the graphene where the P atom is departed from the specific N atoms with two C atoms. In which, the link bonds are agree with the C K-edge result that C-N-C and C-P-C defect sites are coexisted in the carbon lattice. To further explain the synergistic effects that originated from Rh<sub>2</sub>P NPs and NPC, a slab with P doped pyridinic NC (Pri-NPC) anchored on the P-terminated Rh<sub>2</sub>P was used, since the N site on Pri-NPC and the P site on P-terminated Rh<sub>2</sub>P performed the relatively outstanding HER activity among the catalysts mentioned above.

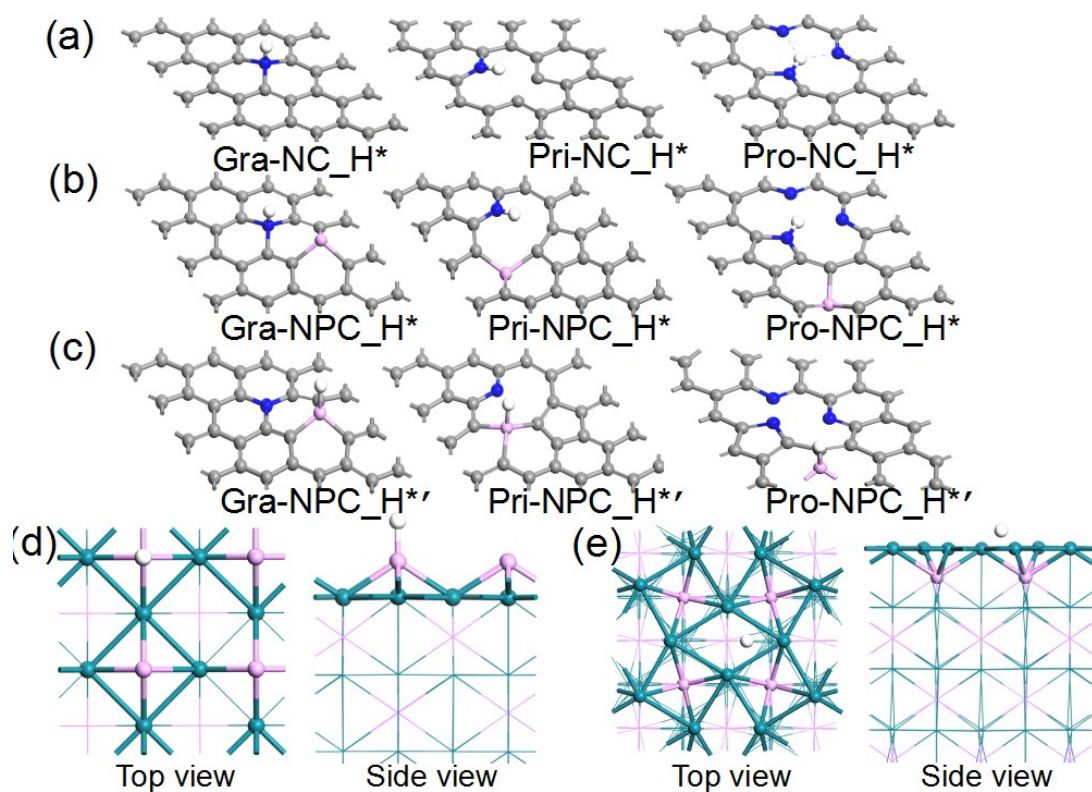

**Figure S23.** Optimized geometry configurations of the hydrogen adsorbed moieties, (a) for NC, (b) for the N site of NPC and (c) for the P site of NPC. (d) H adsorption structures on P terminated and (e) Rh terminated  $\text{Rh}_2\text{P}$ .

Graphitic, pyrrolic, and pyridinic N doped graphene sheets (Gra-NC, Pro-NC and Pri-NC, respectively) with one hydrogen atom adhered on the characteristic N sites were taken into consideration to reveal the effect of N doped carbon on HER activity.



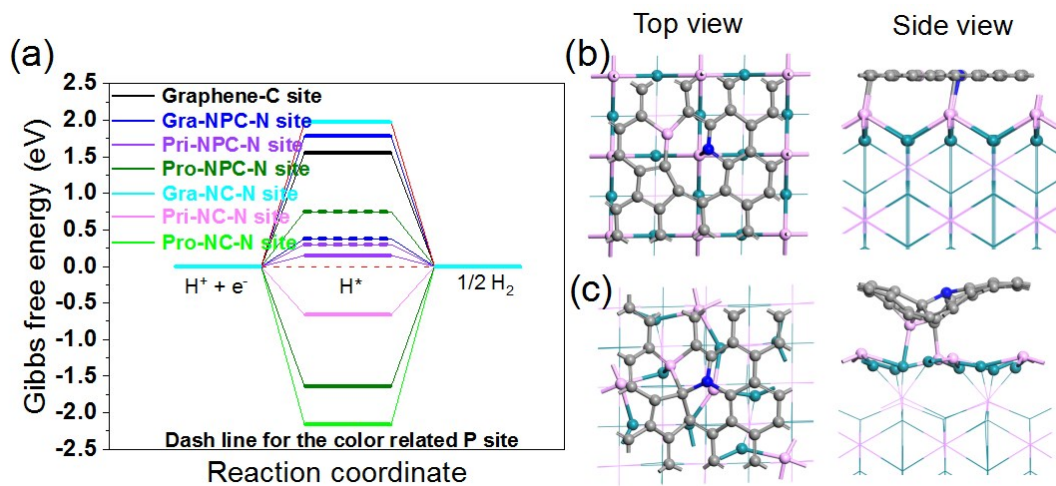

**Figure S24.** HER mechanism. (a) Gibbs free-energy diagrams for HER on NPC and NC. The dash line represents for the color related P site. Initial geometry configurations of (b)  $Rh_2P/NPC$  and (c) optimized structures of  $Rh_2P/NPC$ .

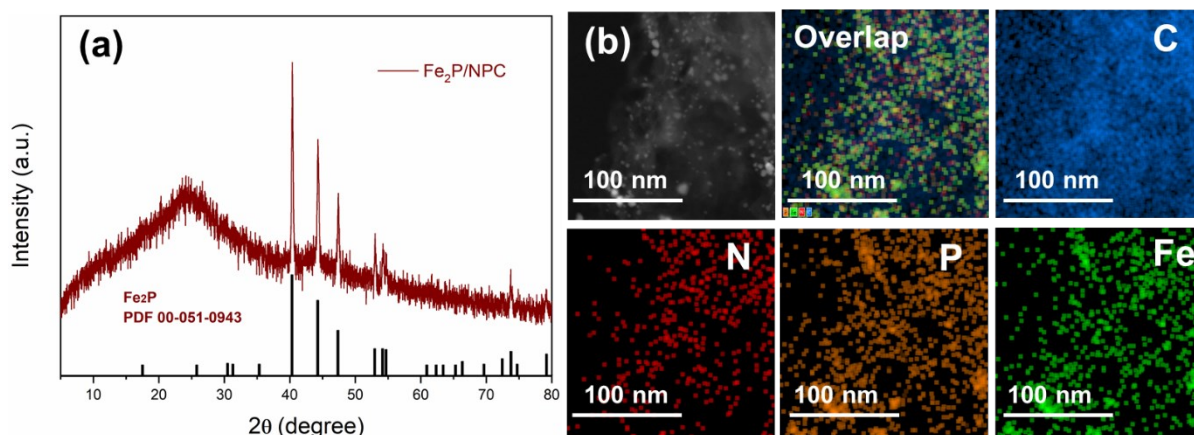

**Figure S25.** (a) XRD pattern and (b) HAADF-STEM-EDS mapping images of  $\text{Fe}_2\text{P}/\text{NPC}$ .

XRD pattern (Figure S22a) confirms the hexagonal  $\text{Fe}_2\text{P}$  phase (PDF No. 00-051-0943, space group: P-62m,  $a = 5.8685$ ,  $b = 5.8685$ ,  $c = 3.4571$ ). The peaks at  $40.4^\circ$ ,  $44.3^\circ$ ,  $47.4^\circ$ ,  $52.9^\circ$ ,  $54.2^\circ$ , and  $73.7^\circ$  can be assigned to the (111), (201), (210), (002), (300) and (212) lattice planes of  $\text{Fe}_2\text{P}$ . HAADF-STEM-EDS mapping images (Figure S22b) show that all the elements including C, N, P, and Fe are homogeneously distributed over the entire NPC.

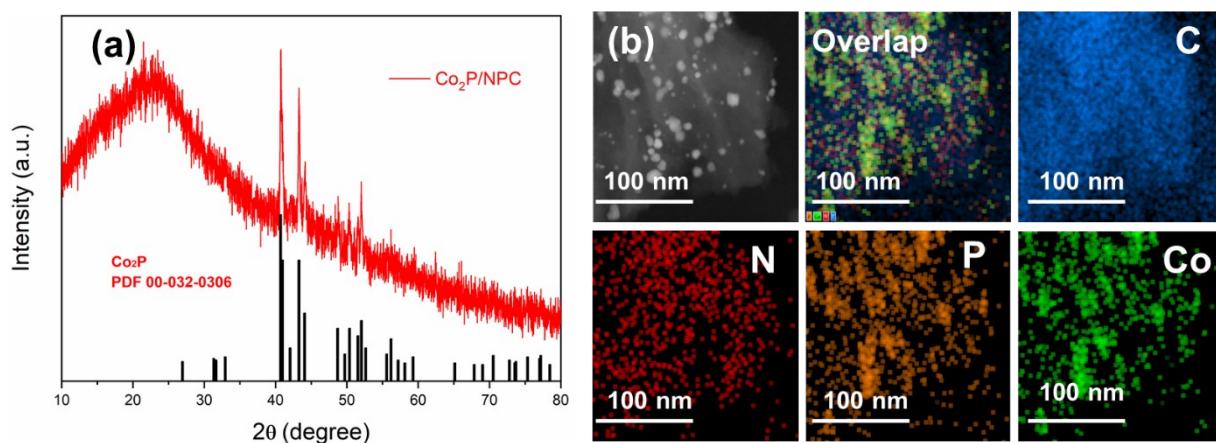

**Figure S26.** (a) XRD pattern and (b) HAADF-STEM-EDS mapping images of Co<sub>2</sub>P/NPC.

XRD pattern (Figure S23a) confirms the orthorhombic Co<sub>2</sub>P phase (PDF No. 00-032-0306, space group: Pnam,  $a = 5.6465$ ,  $b = 6.6099$ ,  $c = 3.5130$ ). The peaks at 40.7°, 43.3°, 44.2°, 48.7°, 50.3°, 51.5°, 52.1° and 56.3° can be assigned to the (121), (211), (130), (031), (310), (131), (002) and (320) lattice planes of Co<sub>2</sub>P. HAADF-STEM-EDS mapping images (Figure S23b) show that all the elements including C, N, P, and Co are homogeneously distributed over the entire NPC.

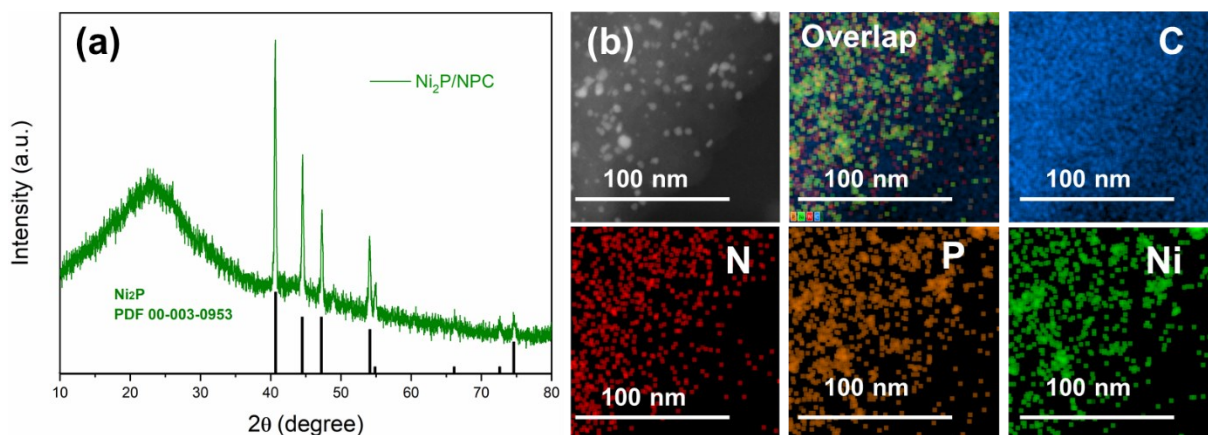

**Figure S27.** (a) XRD pattern and (b) HAADF-STEM-EDS mapping images of  $\text{Ni}_2\text{P}/\text{NPC}$ .

XRD pattern (Figure S24a) confirms the hexagonal  $\text{Ni}_2\text{P}$  phase (PDF No. 00-003-0953, space group: P321,  $a = 5.86$ ,  $b = 5.86$ ,  $c = 3.37$ ). The peaks at  $40.7^\circ$ ,  $44.5^\circ$ ,  $47.2^\circ$ ,  $54.1^\circ$ ,  $54.9^\circ$ ,  $66.2^\circ$ ,  $72.7^\circ$  and  $74.7^\circ$  can be assigned to the (111), (201), (210), (300), (211), (310), (311) and (400) lattice planes of  $\text{Ni}_2\text{P}$ . HAADF-STEM-EDS mapping images (Figure S24b) show that all the elements including C, N, P, and Ni are homogeneously distributed over the entire NPC.

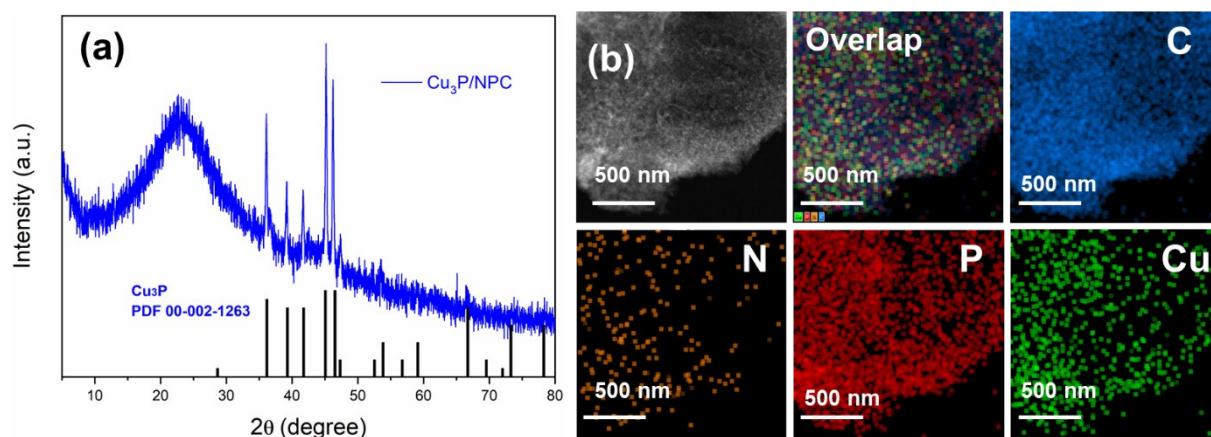

**Figure S28.** (a) XRD pattern and (b) HAADF-STEM-EDS mapping images of Cu<sub>3</sub>P/NPC.

XRD pattern (Figure S25a) confirms the hexagonal Cu<sub>3</sub>P phase (PDF No. 00-002-1263, space group: P-3c1, a = 6.954, b = 6.954, c = 7.149). The peaks at 36.1°, 39.1°, 41.7°, 45.2°, 46.2°, 47.4°, 52.2°, 53.5° and 66.6° can be assigned to the (112), (202), (211), (300), (113), (212), (220), (221) and (223) lattice planes of Cu<sub>3</sub>P. HAADF-STEM-EDS mapping images (Figure S25b) show that all the elements including C, N, P, and Cu are homogeneously distributed over the entire NPC.

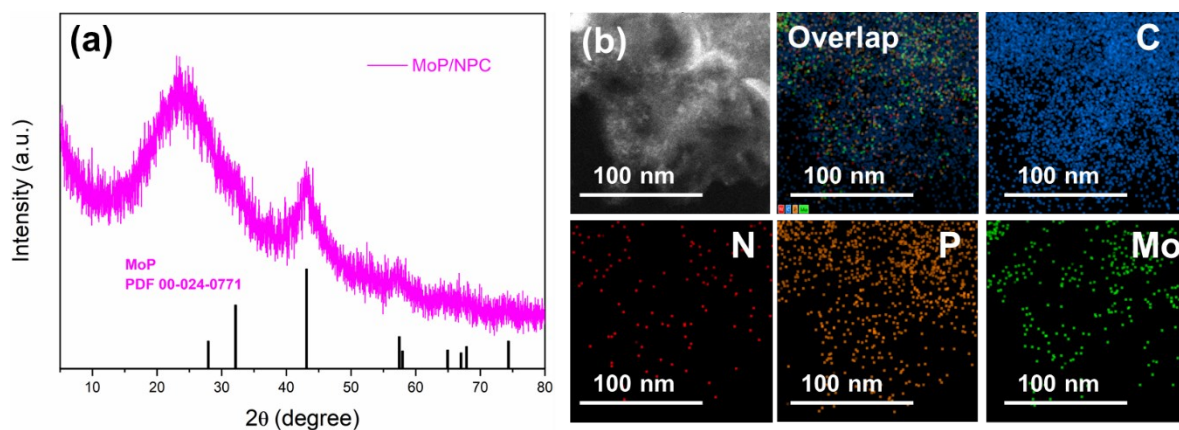

**Figure S29.** (a) XRD pattern and (b) HAADF-STEM-EDS mapping images of MoP/NPC.

XRD pattern (Figure S26a) confirms the hexagonal MoP phase (PDF No. 00-024-0771, space group:  $P-6m2$ ,  $a = 3.222$ ,  $b = 3.222$ ,  $c = 3.191$ ). The peaks at  $43.1^\circ$  and  $57.2^\circ$  can be assigned to the (101) and (110) lattice planes of MoP. HAADF-STEM-EDS mapping images (Figure S26b) show that all the elements including C, N, P, and Mo are homogeneously distributed over the entire NPC.



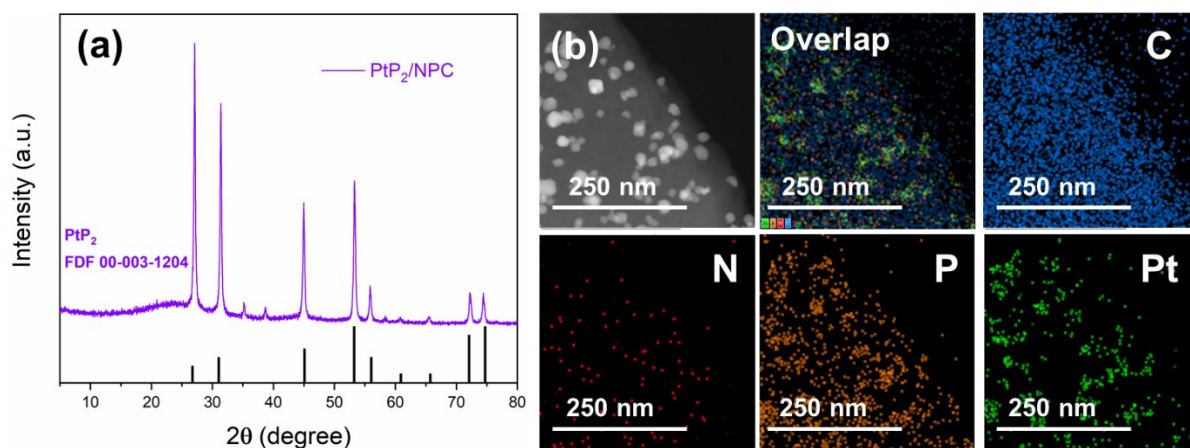

**Figure S30.** (a) XRD pattern and (b) HAADF-STEM-EDS mapping images of PtP<sub>2</sub>/NPC.

XRD pattern (Figure S27a) confirms the cubic PtP<sub>2</sub> phase (PDF No. 00-003-1204, space group: Pa-3,  $a = 5.7$ ,  $b = 5.7$ ,  $c = 5.7$ ). The peaks at 26.9°, 31.1°, 44.9°, 53.4°, 56.0°, 60.7°, 65.5°, 72.1° and 74.4° can be assigned to the (111), (200), (220), (311), (222), (321), (400), (331) and (420) lattice planes of PtP<sub>2</sub>. The small peaks at 35.2°, 38.8° and 58.3° may be impurity peaks. The HAADF-STEM-EDS mapping images (Figure S27b) show that all the elements including C, N, P, and Pt are homogeneously distributed over the entire NPC.

**Table S1.** Structural parameters of the Rh foil, Rh<sub>2</sub>O<sub>3</sub> and Rh<sub>2</sub>P/NPC extracted from the EXAFS fitting. ( $S_0^2=0.80$ ).

| Sample                         | Shell  | N   | R <sub>j</sub> (Å) | $\sigma^2$<br>(10 <sup>-3</sup> Å <sup>2</sup> ) | $\Delta E_0$ (eV) |
|--------------------------------|--------|-----|--------------------|--------------------------------------------------|-------------------|
| Rh foil                        | Rh-Rh  | 12  | 2.71               | 3                                                | 4.1               |
| Rh <sub>2</sub> O <sub>3</sub> | Rh-O   | 6   | 2.03               | 4.8                                              | -3.0              |
|                                | Rh-Rh1 | 1   | 2.71               | 4.9                                              | -3.5              |
|                                | Rh-Rh2 | 3   | 2.98               | 4.9                                              | -3.5              |
| Rh <sub>2</sub> P/NPC          | Rh-P   | 4.0 | 2.34               | 6.2                                              | -2.7              |
|                                | Rh-Rh  | 5.7 | 2.75               | 6.5                                              | 3.9               |



**Table S2.** Calculated adsorption energies and Gibbs free energies of H adsorbed on the related catalysts.

| Binding site                    | Adsorption energy, $E_{\text{ads}}$ /eV | Adsorption free energy, $\Delta G_{\text{H}}$ / eV |
|---------------------------------|-----------------------------------------|----------------------------------------------------|
| Gra-NC-N                        | 1.80                                    | 1.97                                               |
| Pro-NC-N                        | -2.69                                   | -2.16                                              |
| Pri-NC-N                        | -1.09                                   | -0.66                                              |
| Gra-NPC-N                       | 1.62                                    | 1.78                                               |
| Pro-NPC-N                       | -1.80                                   | -1.64                                              |
| Pri-NPC-N                       | -0.05                                   | 0.15                                               |
| Gra-NPC-P                       | 0.22                                    | 0.38                                               |
| Pro-NPC-P                       | 0.00                                    | 0.75                                               |
| Pri-NPC-P                       | 0.10                                    | 0.30                                               |
| Rh <sub>2</sub> P-P-terminated  | -0.09                                   | 0.26                                               |
| Rh <sub>2</sub> P-Rh-terminated | -2.76                                   | -1.83                                              |
| Rh <sub>2</sub> P/NPC-N         | 1.31                                    | 1.47                                               |
| Rh <sub>2</sub> P/NPC-P         | -0.07                                   | -0.06                                              |
